# Supplementary material
Source: PubMed Central journal article supplement (PMC6792369)
Supplement: ehp-127-097005-s001.pdf [file ehp-127-097005-s001.pdf]

**Note to readers with disabilities:** *EHP* strives to ensure that all journal content is accessible to all readers. However, some figures and Supplemental Material published in *EHP* articles may not conform to [508 standards](#) due to the complexity of the information being presented. If you need assistance accessing journal content, please contact [ehp508@niehs.nih.gov](mailto:ehp508@niehs.nih.gov). Our staff will work with you to assess and meet your accessibility needs within 3 working days.

### **Supplemental Material**

#### **Precipitation and Salmonellosis Incidence in Georgia, USA: Interactions between Extreme Rainfall Events and Antecedent Rainfall Conditions**

Debbie Lee, Howard H. Chang, Stefanie Ebel Sarnat, and Karen Levy

#### **Table of Contents**

**Table S1.** Incidence rate ratios (IRR) and 95% confidence intervals (CI) of parameters in multivariate models of salmonellosis incidence attributed to all serovars (Model 3).

**Table S2.** Incidence rate ratios (IRR) and 95% confidence intervals (CI) for combinations of precipitation conditions (extreme precipitation at the 90<sup>th</sup>, 95<sup>th</sup>, and 99<sup>th</sup> percentile and antecedent conditions) in Model 3 when considering salmonellosis from all serovars.

**Table S3.** Incidence rate ratios (IRR) for combinations of precipitation conditions (extreme precipitation at the 90<sup>th</sup>, 95<sup>th</sup>, and 99<sup>th</sup> percentile and antecedent conditions) in Model 3 when considering salmonellosis from environmental serovars.

**Table S4.** Comparison of incidence rate ratios (IRR) and 95% confidence intervals (CI) of 1-3 week lags in precipitation-related variables in multivariate models of salmonellosis incidence from all serovars (top) and environmental serovars (bottom) in the Coastal Plain counties.

Supplementary Table S1: Incidence rate ratios (IRR) and 95% confidence intervals (CI) of parameters in multivariate models of salmonellosis incidence attributed to all serovars (Model 3).

|                               | All Counties IRR<br>(95% CI) | Coastal Plain<br>Counties IRR<br>(95% CI) | Northern Counties<br>IRR (95% CI) |
|-------------------------------|------------------------------|-------------------------------------------|-----------------------------------|
| Extreme <sup>a</sup>          | 1.09 (1.04, 1.13)            | 1.11 (1.05, 1.18)                         | 1.03 (0.97, 1.09)                 |
| Dry (Antecedent) <sup>b</sup> | 0.94 (0.90, 0.98)            | 0.92 (0.87, 0.98)                         | 1.01 (0.96, 1.07)                 |
| Wet (Antecedent) <sup>b</sup> | 1.08 (1.03, 1.12)            | 1.13 (1.06, 1.19)                         | 0.94 (0.89, 1.00)                 |
| Temperature <sup>c</sup>      | 1.52 (1.47, 1.57)            | 1.75 (1.66, 1.84)                         | 1.37 (1.31, 1.43)                 |
| Spring <sup>d</sup>           | 1.05 (1.00, 1.11)            | 0.94 (0.86, 1.02)                         | 1.16 (1.08, 1.25)                 |
| Summer <sup>d</sup>           | 1.92 (1.80, 2.05)            | 2.04 (1.85, 2.26)                         | 1.77 (1.61, 1.93)                 |
| Fall <sup>d</sup>             | 1.91 (1.82, 2.01)            | 2.42 (2.25, 2.61)                         | 1.46 (1.37, 1.56)                 |
| Extreme*Dry                   | 1.00 (0.94, 1.06)            | 1.02 (0.93, 1.11)                         | 1.00 (0.92, 1.08)                 |
| Extreme*Wet                   | 0.94 (0.88, 1.00)            | 0.89 (0.82, 0.97)                         | 1.04 (0.96, 1.13)                 |

<sup>a</sup>The dichotomous 'Extreme' variable refers to the presence of an extreme rainfall event (0 = no extreme event, 1 = extreme event) in the week preceding the week of disease incidence.

<sup>b</sup>'Antecedent' rainfall levels in the eight weeks prior to an extreme event were categorized into tertiles of overall precipitation (dry, moderate rainfall, and wet), with moderate rainfall as the reference category.

<sup>c</sup>The continuous 'Temperature' variable indicates a ten-degree change in average temperature (degrees Celsius).

<sup>d</sup>The categorical variable to control for season (winter, spring, summer, fall) uses winter as the reference category.

Supplementary Table S2: Incidence rate ratios (IRR) and 95% confidence intervals (CI) for combinations of precipitation conditions (extreme precipitation at the 90<sup>th</sup>, 95<sup>th</sup>, and 99<sup>th</sup> percentile and antecedent conditions) in Model 3 when considering salmonellosis from all serovars.

|                             |          | All Counties IRR<br>(95% CI) | Coastal Plain<br>Counties IRR (95%<br>CI) | Northern Counties<br>IRR (95% CI) |
|-----------------------------|----------|------------------------------|-------------------------------------------|-----------------------------------|
| 90 <sup>th</sup> percentile |          |                              |                                           |                                   |
| No Extreme                  | Low      | 0.94 (0.90, 0.98)            | 0.92 (0.87, 0.98)                         | 1.01 (0.96, 1.07)                 |
|                             | Moderate | (Ref)                        | (Ref)                                     | (Ref)                             |
|                             | High     | 1.08 (1.03, 1.13)            | 1.13 (1.06, 1.19)                         | 0.94 (0.89, 1.00)                 |
| Extreme                     | Low      | 1.02 (0.97, 1.06)            | 1.04 (0.98, 1.11)                         | 1.04 (0.98, 1.10)                 |
|                             | Moderate | 1.09 (1.04, 1.13)            | 1.11 (1.05, 1.18)                         | 1.03 (0.97, 1.09)                 |
|                             | High     | 1.09 (1.05, 1.14)            | 1.11 (1.05, 1.18)                         | 1.01 (0.95, 1.07)                 |
| 95 <sup>th</sup> percentile |          |                              |                                           |                                   |
| No Extreme                  | Low      | 0.94 (0.91, 0.97)            | 0.93 (0.89, 0.97)                         | 1.01 (0.96, 1.05)                 |
|                             | Moderate | (Ref)                        | (Ref)                                     | (Ref)                             |
|                             | High     | 1.04 (1.01, 1.07)            | 1.06 (1.02, 1.10)                         | 0.99 (0.95, 1.04)                 |
| Extreme                     | Low      | 0.96 (0.89, 1.04)            | 0.93 (0.83, 1.05)                         | 1.07 (0.97, 1.18)                 |
|                             | Moderate | 1.15 (1.07, 1.23)            | 1.19 (1.09, 1.31)                         | 1.11 (1.01, 1.22)                 |
|                             | High     | 1.06 (0.99, 1.13)            | 1.13 (1.03, 1.23)                         | 1.03 (0.95, 1.13)                 |
| 99 <sup>th</sup> percentile |          |                              |                                           |                                   |
| No Extreme                  | Low      | 0.93 (0.91, 0.96)            | 0.92 (0.88, 0.96)                         | 1.01 (0.97, 1.05)                 |
|                             | Moderate | (Ref)                        | (Ref)                                     | (Ref)                             |
|                             | High     | 1.04 (1.01, 1.07)            | 1.06 (1.02, 1.10)                         | 0.99 (0.95, 1.03)                 |
| Extreme                     | Low      | 0.92 (0.78, 1.09)            | 1.07 (0.85, 1.34)                         | 0.88 (0.69, 1.13)                 |
|                             | Moderate | 1.26 (1.11, 1.44)            | 1.37 (1.16, 1.62)                         | 1.15 (0.94, 1.40)                 |
|                             | High     | 0.94 (0.83, 1.07)            | 0.96 (0.78, 1.18)                         | 1.01 (0.86, 1.19)                 |

Supplementary Table S3: Incidence rate ratios (IRR) for combinations of precipitation conditions (extreme precipitation at the 90<sup>th</sup>, 95<sup>th</sup>, and 99<sup>th</sup> percentile and antecedent conditions) in Model 3 when considering salmonellosis from environmental serovars.

|                             |          | All Counties IRR<br>(95% CI) | Coastal Plain<br>Counties IRR (95%<br>CI) | Northern Counties<br>IRR (95% CI) |
|-----------------------------|----------|------------------------------|-------------------------------------------|-----------------------------------|
| 90 <sup>th</sup> percentile |          |                              |                                           |                                   |
| No Extreme                  | Low      | 0.97 (0.88, 1.07)            | 0.96 (0.86, 1.09)                         | 0.95 (0.81, 1.11)                 |
|                             | Moderate | (Ref)                        | (Ref)                                     | (Ref)                             |
|                             | High     | 1.19 (1.09, 1.31)            | 1.29 (1.16, 1.44)                         | 0.90 (0.76, 1.06)                 |
| Extreme                     | Low      | 1.12 (1.01, 1.23)            | 1.20 (1.06, 1.35)                         | 1.05 (0.90, 1.22)                 |
|                             | Moderate | 1.18 (1.07, 1.29)            | 1.22 (1.09, 1.37)                         | 1.06 (0.91, 1.24)                 |
|                             | High     | 1.28 (1.17, 1.40)            | 1.34 (1.20, 1.49)                         | 1.14 (0.97, 1.34)                 |
| 95 <sup>th</sup> percentile |          |                              |                                           |                                   |
| No Extreme                  | Low      | 0.99 (0.92, 1.06)            | 0.98 (0.89, 1.07)                         | 1.01 (0.90, 1.13)                 |
|                             | Moderate | (Ref)                        | (Ref)                                     | (Ref)                             |
|                             | High     | 1.13 (1.06, 1.21)            | 1.15 (1.07, 1.25)                         | 1.07 (0.96, 1.21)                 |
| Extreme                     | Low      | 0.93 (0.78, 1.11)            | 0.99 (0.79, 1.24)                         | 0.92 (0.70, 1.21)                 |
|                             | Moderate | 1.29 (1.12, 1.49)            | 1.30 (1.09, 1.54)                         | 1.32 (1.03, 1.69)                 |
|                             | High     | 1.26 (1.11, 1.44)            | 1.37 (1.16, 1.60)                         | 1.21 (0.96, 1.52)                 |
| 99 <sup>th</sup> percentile |          |                              |                                           |                                   |
| No Extreme                  | Low      | 0.97 (0.91, 1.04)            | 0.96 (0.88, 1.04)                         | 0.99 (0.89, 1.10)                 |
|                             | Moderate | (Ref)                        | (Ref)                                     | (Ref)                             |
|                             | High     | 1.12 (1.06, 1.20)            | 1.15 (1.07, 1.24)                         | 1.06 (0.95, 1.19)                 |
| Extreme                     | Low      | 0.76 (0.50, 1.15)            | 1.04 (0.65, 1.67)                         | 0.43 (0.18, 1.04)                 |
|                             | Moderate | 1.36 (1.04, 1.77)            | 1.38 (1.00, 1.89)                         | 1.32 (0.80, 2.17)                 |
|                             | High     | 1.08 (0.82, 1.42)            | 1.08 (0.74, 1.56)                         | 1.27 (0.52, 3.09)                 |

Supplementary Table S4: Comparison of incidence rate ratios (IRR) and 95% confidence intervals (CI) of 1-3 week lags in precipitation-related variables in multivariate models of salmonellosis incidence from all serovars (top) and environmental serovars (bottom) in the Coastal Plain counties.

| Extreme                | Antecedent | 1-week lag IRR<br>(95% CI) | 2-week lag IRR<br>(95% CI) | 3-week lag IRR<br>(95% CI) |
|------------------------|------------|----------------------------|----------------------------|----------------------------|
| All Serovars           |            |                            |                            |                            |
| No                     | Dry        | 0.92 (0.87, 0.98)          | 0.92 (0.87, 0.98)          | 0.93 (0.87, 0.99)          |
|                        | Mod        | (Ref)                      | (Ref)                      | (Ref)                      |
|                        | Wet        | 1.13 (1.06, 1.19)          | 1.07 (1.01, 1.14)          | 1.10 (1.03, 1.16)          |
| Yes                    | Dry        | 1.04 (0.98, 1.11)          | 0.99 (0.93, 1.06)          | 1.02 (0.96, 1.09)          |
|                        | Mod        | 1.11 (1.05, 1.18)          | 1.07 (1.01, 1.14)          | 1.07 (1.01, 1.14)          |
|                        | Wet        | 1.11 (1.05, 1.18)          | 1.13 (1.06, 1.20)          | 1.12 (1.06, 1.19)          |
| Environmental Serovars |            |                            |                            |                            |
| No                     | Dry        | 0.96 (0.86, 1.09)          | 0.92 (0.81, 1.03)          | 0.92 (0.82, 1.04)          |
|                        | Mod        | (Ref)                      | (Ref)                      | (Ref)                      |
|                        | Wet        | 1.29 (1.16, 1.44)          | 1.14 (1.03, 1.27)          | 1.20 (1.07, 1.33)          |
| Yes                    | Dry        | 1.20 (1.06, 1.35)          | 0.96 (0.85, 1.09)          | 1.02 (0.90, 1.16)          |
|                        | Mod        | 1.22 (1.09, 1.37)          | 1.07 (0.96, 1.20)          | 1.13 (1.01, 1.26)          |
|                        | Wet        | 1.34 (1.20, 1.49)          | 1.22 (1.10, 1.36)          | 1.24 (1.11, 1.38)          |
