# Supplementary material
Source: PubMed Central journal article supplement (PMC6792369)
Supplement: ehp-127-097005-s002.pdf [file ehp-127-097005-s002.pdf]

**Note to readers with disabilities:** *EHP* strives to ensure that all journal content is accessible to all readers. However, some figures and Supplemental Material published in *EHP* articles may not conform to [508 standards](#) due to the complexity of the information being presented. If you need assistance accessing journal content, please contact [ehp508@niehs.nih.gov](mailto:ehp508@niehs.nih.gov). Our staff will work with you to assess and meet your accessibility needs within 3 working days.

### **Supplemental Material**

#### **Precipitation and Salmonellosis Incidence in Georgia, USA: Interactions between Extreme Rainfall Events and Antecedent Rainfall Conditions**

Debbie Lee, Howard H. Chang, Stefanie Ebel Sarnat, and Karen Levy

#### **Table of Contents**

**Table S1.** Incidence rate ratios (IRR) and 95% confidence intervals (CI) of parameters in multivariate models of salmonellosis incidence attributed to all serovars (Model 3).

**Table S2.** Incidence rate ratios (IRR) and 95% confidence intervals (CI) for combinations of precipitation conditions (extreme precipitation at the 90<sup>th</sup>, 95<sup>th</sup>, and 99<sup>th</sup> percentile and antecedent conditions) in Model 3 when considering salmonellosis from all serovars.

**Table S3.** Incidence rate ratios (IRR) for combinations of precipitation conditions (extreme precipitation at the 90<sup>th</sup>, 95<sup>th</sup>, and 99<sup>th</sup> percentile and antecedent conditions) in Model 3 when considering salmonellosis from environmental serovars.

**Table S4.** Comparison of incidence rate ratios (IRR) and 95% confidence intervals (CI) of 1-3 week lags in precipitation-related variables in multivariate models of salmonellosis incidence from all serovars (top) and environmental serovars (bottom) in the Coastal Plain counties.
